# Supplementary material for: High Dimensional Variable Selection with Error Control
Source: PubMed Central journal article supplement (PMC5002494; doi:10.1155/2016/8209453), 2016-08-15

## Supplementary Files

Table S1| The true positive rate (TP), the false positive rate (FP), the false discovery rate (FDR), the average number of false positive in the final model (ANFP), model size (Size), and the area under the curve (AUROC), the number of filtered truly important variable from FDR and RF (# filter) under the low correlation coefficients,  $\rho=0$  for the 500 simulations.

| screening             | method | TP                   | FP              | FDR                  | ANFP                | Size               | AUROC                | # filter            |
|-----------------------|--------|----------------------|-----------------|----------------------|---------------------|--------------------|----------------------|---------------------|
| $FDR_{.05}$<br>– ISIS | LASSO  | 0.2348<br>(0.00233)  | 2e-06<br>(0)    | 0.02917<br>(0.00277) | 0.204<br>(0.01912)  | 6.074<br>(0.063)   | 0.81701<br>(0.00165) | 6.074<br>(0.063)    |
|                       | SCAD   | 0.2348<br>(0.00233)  | 2e-06<br>(0)    | 0.02917<br>(0.00277) | 0.204<br>(0.01912)  | 6.074<br>(0.063)   | 0.81701<br>(0.00165) |                     |
|                       | MCP    | 0.2348<br>(0.00233)  | 2e-06<br>(0)    | 0.0283<br>(0.00274)  | 0.198<br>(0.01893)  | 6.068<br>(0.06292) | 0.81701<br>(0.00165) |                     |
| $FDR_{.20}$<br>– ISIS | LASSO  | 0.28056<br>(0.00259) | 1.28e-05<br>(0) | 0.13122<br>(0.00566) | 1.284<br>(0.06609)  | 8.298<br>(0.10205) | 0.82968<br>(0.00165) | 8.298<br>(0.10205)  |
|                       | SCAD   | 0.28056<br>(0.00259) | 1.28e-05<br>(0) | 0.13092<br>(0.00565) | 1.28<br>(0.066)     | 8.294<br>(0.10184) | 0.82965<br>(0.00165) |                     |
|                       | MCP    | 0.28056<br>(0.00259) | 1.23e-05<br>(0) | 0.12636<br>(0.00568) | 1.234<br>(0.06602)  | 8.248<br>(0.10092) | 0.82978<br>(0.00165) |                     |
| $RF_{1000}$<br>– ISIS | LASSO  | 0.45512<br>(0.00257) | 0.000116<br>(0) | 0.5053<br>(0.00279)  | 11.622<br>(0.06418) | 23<br>(0)          | 0.84898<br>(0.00158) | 14.392<br>(0.06546) |
|                       | SCAD   | 0.45728<br>(0.00261) | 0.000115<br>(0) | 0.50296<br>(0.00283) | 11.568<br>(0.06514) | 23<br>(0)          | 0.84888<br>(0.00157) |                     |
|                       | MCP    | 0.46192<br>(0.00269) | 0.000114<br>(0) | 0.49791<br>(0.00293) | 11.452<br>(0.06735) | 23<br>(0)          | 0.84956<br>(0.00157) |                     |

(): standard deviation

Table S2| The true positive rate (TP), the false positive rate (FP), the false discovery rate (FDR), the average number of false positive in the final model (ANFP), model size (Size), and the area under receiver operating characteristic curve (AUROC), the number of filtered truly important variable from FDR and RF (# filter) under the low correlation coefficients,  $\rho= 0.4$  for the 500 simulations.

| screening                                  | method | TP                   | FP               | FDR                  | ANFP                | Size                | AUROC                | # filter            |
|--------------------------------------------|--------|----------------------|------------------|----------------------|---------------------|---------------------|----------------------|---------------------|
| <i>FDR</i> <sub>.05</sub><br>– <i>ISIS</i> | LASSO  | 0.19448<br>(0.00149) | 1.8e-06<br>(0)   | 0.02953<br>(0.00327) | 0.184<br>(0.0211)   | 5.046<br>(0.04413)  | 0.76712<br>(0.00159) | 5.052<br>(0.0448)   |
|                                            | SCAD   | 0.1936<br>(0.00149)  | 1.8e-06<br>(0)   | 0.02953<br>(0.00327) | 0.184<br>(0.0211)   | 5.024<br>(0.0443)   | 0.76702<br>(0.00159) |                     |
|                                            | MCP    | 0.19088<br>(0.00154) | 1.8e-06<br>(0)   | 0.02973<br>(0.00329) | 0.184<br>(0.0211)   | 4.956<br>(0.04561)  | 0.76658<br>(0.00159) |                     |
| <i>FDR</i> <sub>.20</sub><br>– <i>ISIS</i> | LASSO  | 0.22728<br>(0.00188) | 9.9e-06<br>(0)   | 0.12385<br>(0.00588) | 0.99<br>(0.05595)   | 6.672<br>(0.07893)  | 0.77586<br>(0.00165) | 6.690<br>(0.07975)  |
|                                            | SCAD   | 0.2248<br>(0.00179)  | 9.9e-06<br>(0)   | 0.12493<br>(0.00591) | 0.99<br>(0.05595)   | 6.61<br>(0.07741)   | 0.77574<br>(0.00165) |                     |
|                                            | MCP    | 0.22152<br>(0.00185) | 9.9e-06<br>(0)   | 0.12579<br>(0.00597) | 0.988<br>(0.05591)  | 6.526<br>(0.07863)  | 0.77527<br>(0.00165) |                     |
| <i>RS</i> <sub>1000</sub><br>– <i>ISIS</i> | LASSO  | 0.3428<br>(0.00246)  | 0.0001442<br>(0) | 0.62705<br>(0.00269) | 14.412<br>(0.06232) | 22.982<br>(0.00595) | 0.76657<br>(0.00184) | 11.876<br>(0.07313) |
|                                            | SCAD   | 0.33832<br>(0.0024)  | 0.0001452<br>(0) | 0.63175<br>(0.00263) | 14.514<br>(0.06108) | 22.972<br>(0.00739) | 0.76576<br>(0.00185) |                     |
|                                            | MCP    | 0.33496<br>(0.00236) | 0.000146<br>(0)  | 0.63542<br>(0.00258) | 14.598<br>(0.06007) | 22.972<br>(0.00739) | 0.76553<br>(0.00184) |                     |

( ): standard deviation

Table S3| Average true regression coefficients for the 25 variables

| Variable name | True regression coefficient |
|---------------|-----------------------------|
| g01           | 1.12939                     |
| g02           | 0.28505                     |
| g03           | -1.45882                    |
| g04           | 0.12632                     |
| g05           | -0.35443                    |
| g06           | -1.01840                    |
| g07           | 1.65116                     |
| g08           | -0.76401                    |
| g09           | 0.84540                     |
| g010          | -0.69254                    |
| g11           | -0.07449                    |
| g12           | 0.96375                     |
| g13           | 0.23261                     |
| g14           | -0.42302                    |
| g15           | 0.47535                     |
| g16           | -0.12398                    |
| g17           | -0.33047                    |
| g18           | -0.87834                    |
| g19           | 1.57071                     |
| g20           | -1.23074                    |
| g21           | 0.73234                     |
| g022          | -0.55067                    |
| g23           | 1.17932                     |
| g24           | 0.96817                     |
| g25           | -0.72762                    |

Table S4| AUROC scores, the corresponding confidence interval, and standard error for LASSO, SCAD, and MCP methods on six different screening scenarios with prostate cancer data.

| Method                        |                    | AUROC   | Confidence Interval |         | S.E     |
|-------------------------------|--------------------|---------|---------------------|---------|---------|
| Screening                     | Variable Selection |         | lower               | upper   |         |
| $FDR_{0.01}$<br>– <i>ISIS</i> | LASSO              | 0.74622 | 0.67467             | 0.81777 | 0.03650 |
|                               | SCAD               | 0.74585 | 0.67429             | 0.8174  | 0.03651 |
|                               | MCP                | 0.76437 | 0.69508             | 0.83366 | 0.03535 |
| $FDR_{0.05}$<br>– <i>ISIS</i> | LASSO              | 0.69712 | 0.61929             | 0.77495 | 0.03971 |
|                               | SCAD               | 0.71405 | 0.63739             | 0.79072 | 0.03911 |
|                               | MCP                | 0.68335 | 0.60335             | 0.76335 | 0.04081 |
| $FDR_{0.20}$<br>– <i>ISIS</i> | LASSO              | 0.70906 | 0.63178             | 0.78634 | 0.03943 |
|                               | SCAD               | 0.68944 | 0.61178             | 0.76711 | 0.03962 |
|                               | MCP                | 0.71539 | 0.63801             | 0.79278 | 0.03948 |
| $RF_{1000}$                   | LASSO              | 0.73586 | 0.66149             | 0.81024 | 0.03794 |
|                               | SCAD               | 0.73757 | 0.66269             | 0.81245 | 0.03820 |
|                               | MCP                | 0.73757 | 0.66269             | 0.81245 | 0.03820 |
| $RF_{2000}$                   | LASSO              | 0.73684 | 0.66227             | 0.81140 | 0.03804 |
|                               | SCAD               | 0.70626 | 0.62894             | 0.78357 | 0.03944 |
|                               | MCP                | 0.71929 | 0.64044             | 0.79815 | 0.04023 |
| $RF_{4000}$                   | LASSO              | 0.69273 | 0.61330             | 0.77216 | 0.04052 |
|                               | SCAD               | 0.72100 | 0.64440             | 0.79759 | 0.03907 |
|                               | MCP                | 0.69480 | 0.61450             | 0.77511 | 0.04097 |

S.E was estimated by bootstrapping approach.

Figure S1| Selection frequencies of each of the 25 variables across the LASSO, the SCAD, and the MCP during 500 simulations with  $\rho = 0$ . The x-axis depicts the names of the variables, and the y-axis is the frequency of variables selected out of 500 simulations. The variables not depicted on the x-axis in Figure 2 did not have any counts. Each of the three methods is identified by color in legend.

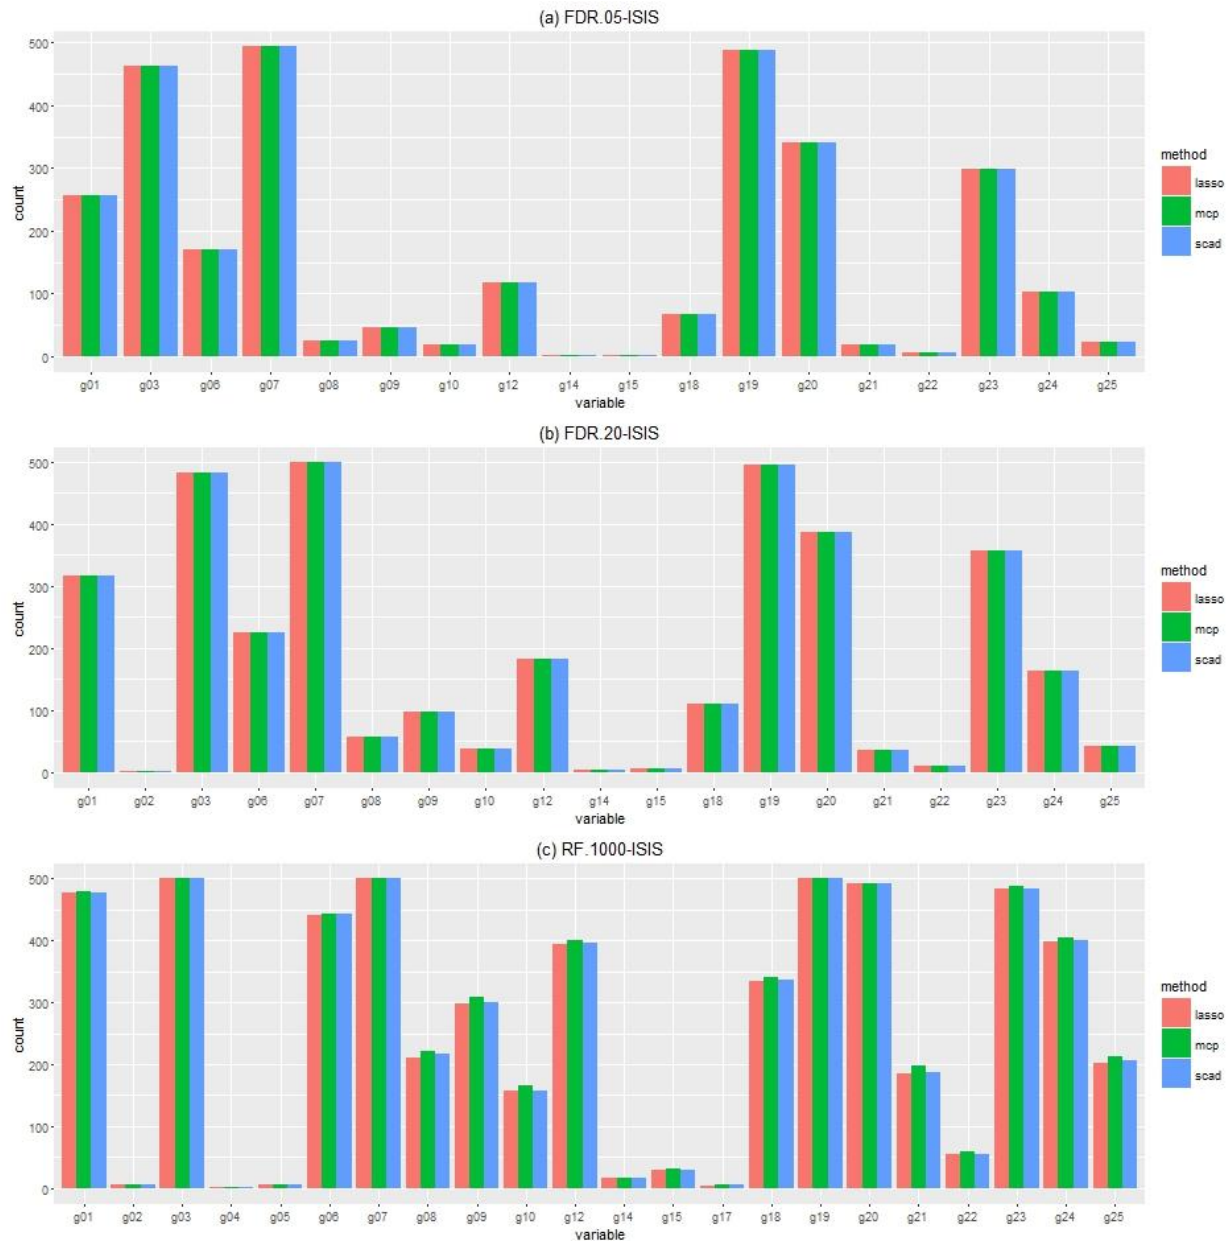

Figure S2| Selection frequencies of each of the 25 variables across the LASSO, the SCAD, and the MCP during 500 simulations with  $\rho = 0.4$ . The x-axis depicts the names of the variables, and the y-axis is the frequency of variables selected out of 500 simulations. The variables not depicted on the x-axis in Figure 2 did not have any counts. Each of the three methods is identified by color in legend.

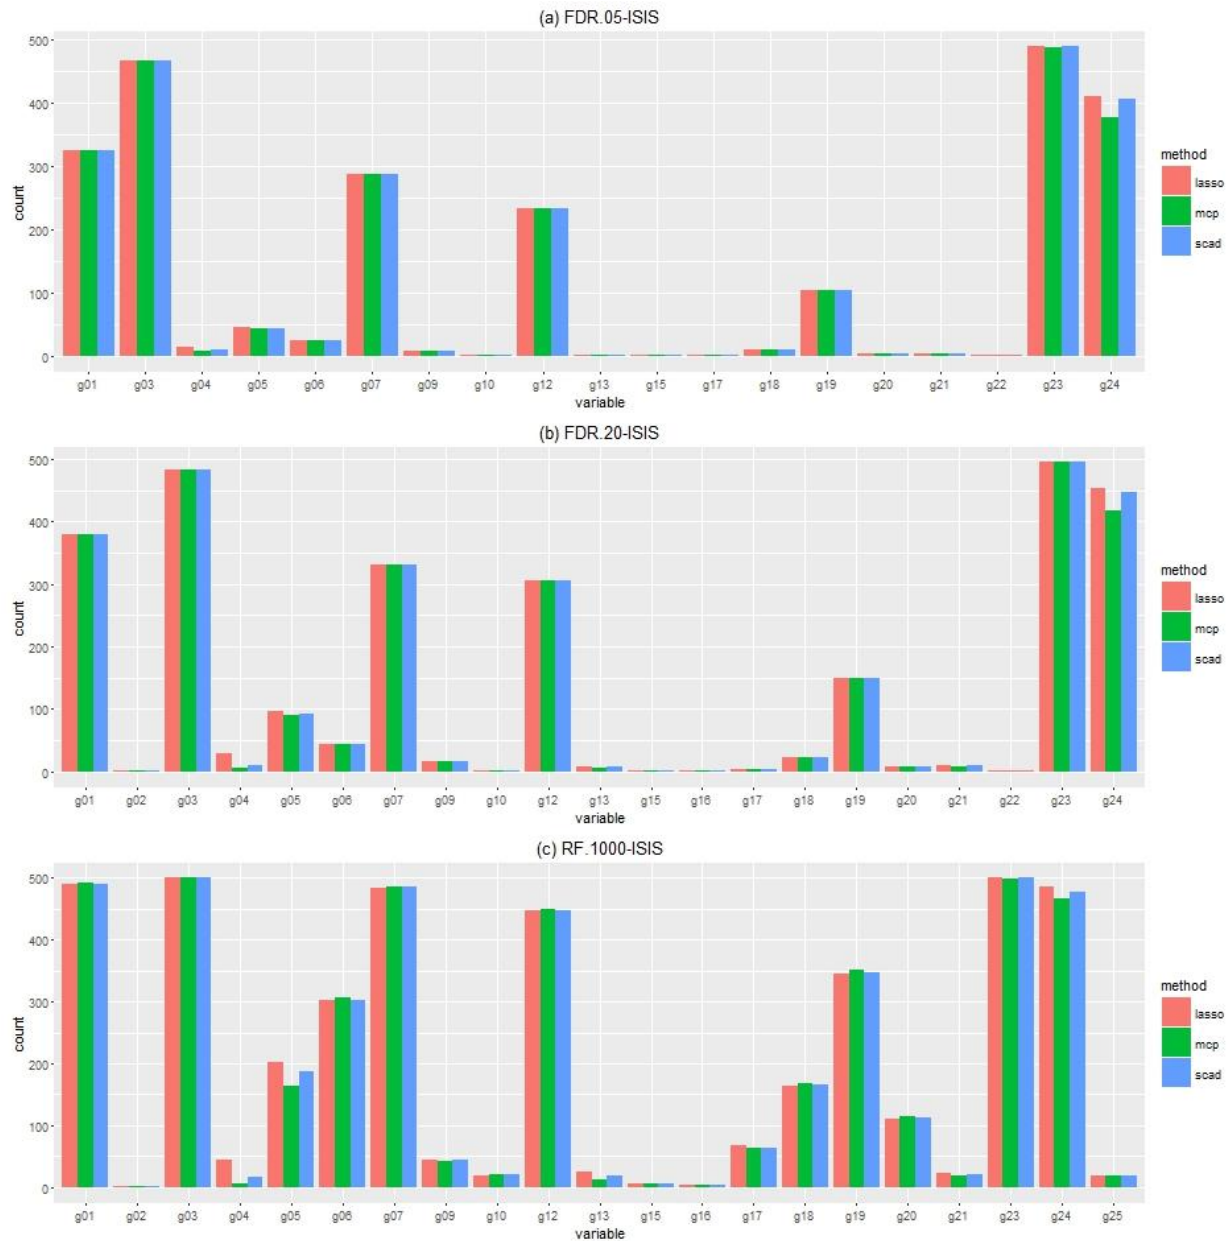

Figure S3| First column is the box plots of the AUROC scores under  $\rho = 0$ . x-axis is the name of variable selection methods ,and y-axis is the AUROC scores. Second column is the box plots of the corresponding false discovery rate, and y-axis the false discovery rate during 500 simulations.

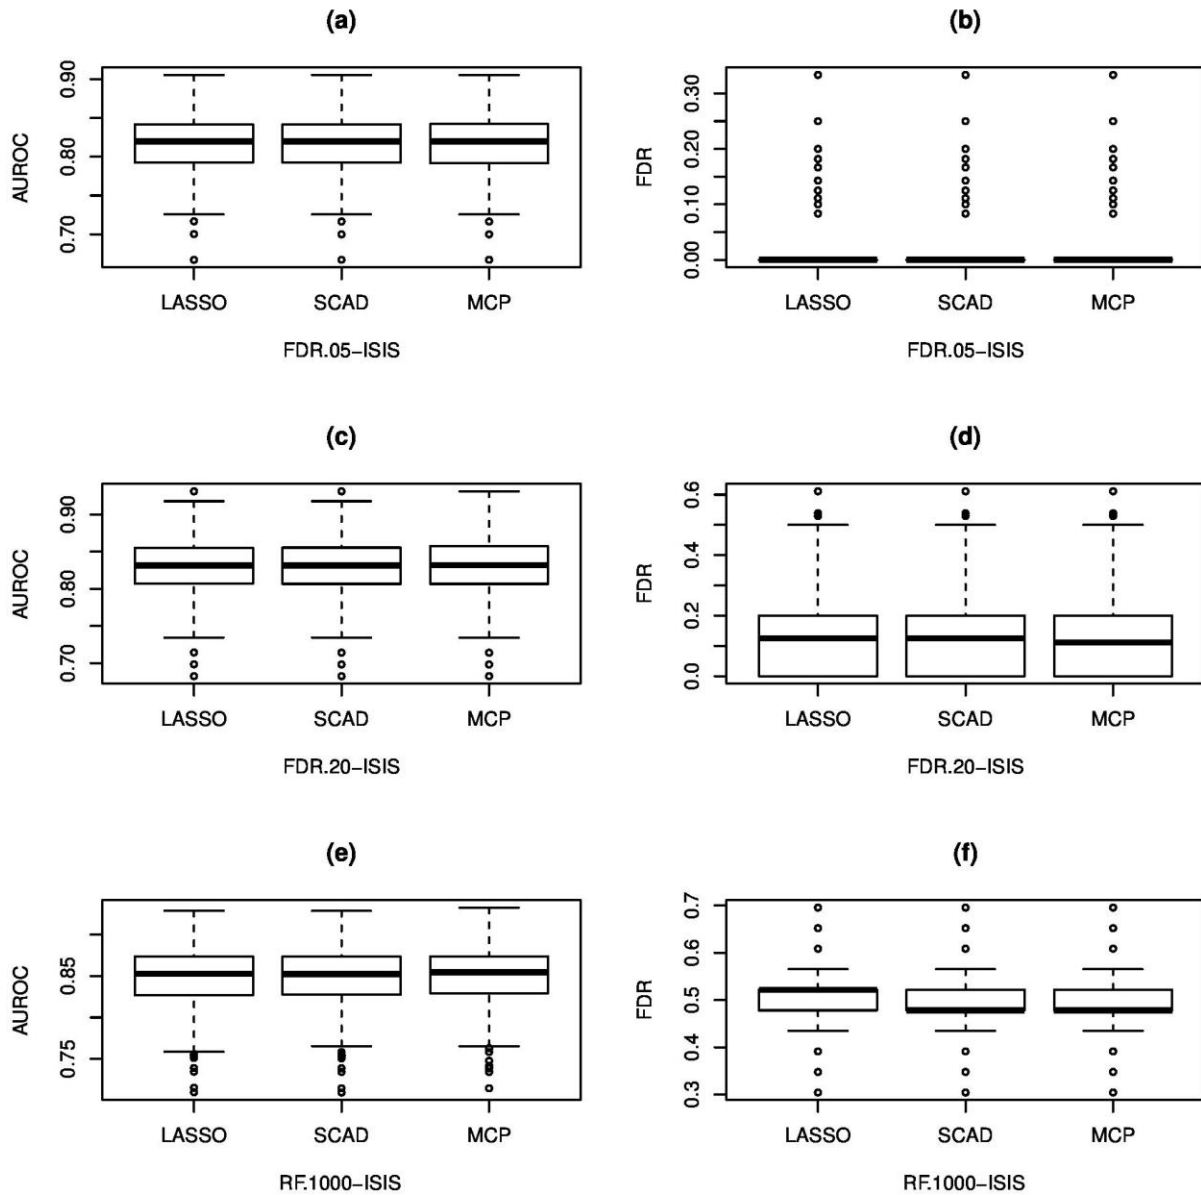

Figure S4| First column is the box plots of the AUROC scores under  $\rho = 0.4$ . x-axis is the name of variable selection methods ,and y –axis is the AUROC scores. Second column is the box plots of the corresponding false discovery rate, and y-axis the false discovery rate during 500 simulations.

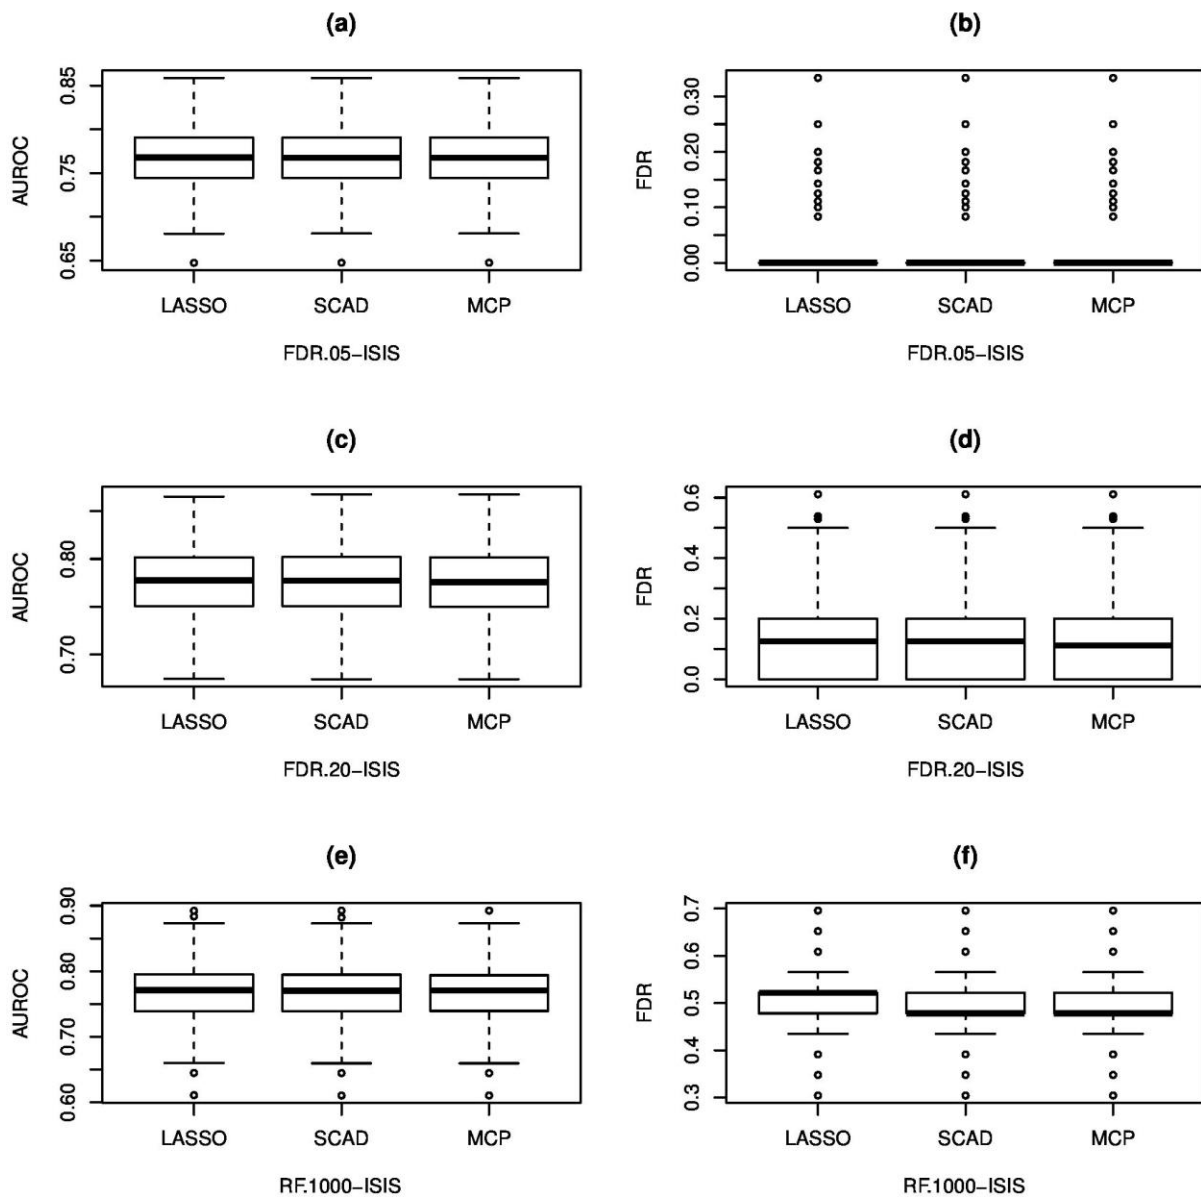



Figure S5| Boxplots of the expressions of 12 detected genes on the prostate cancer. Both AN07 and MYBPC1 are the top down-regulated whereas the rest of them are the top up-regulated. The red color is no metastasis and another is metastasis.

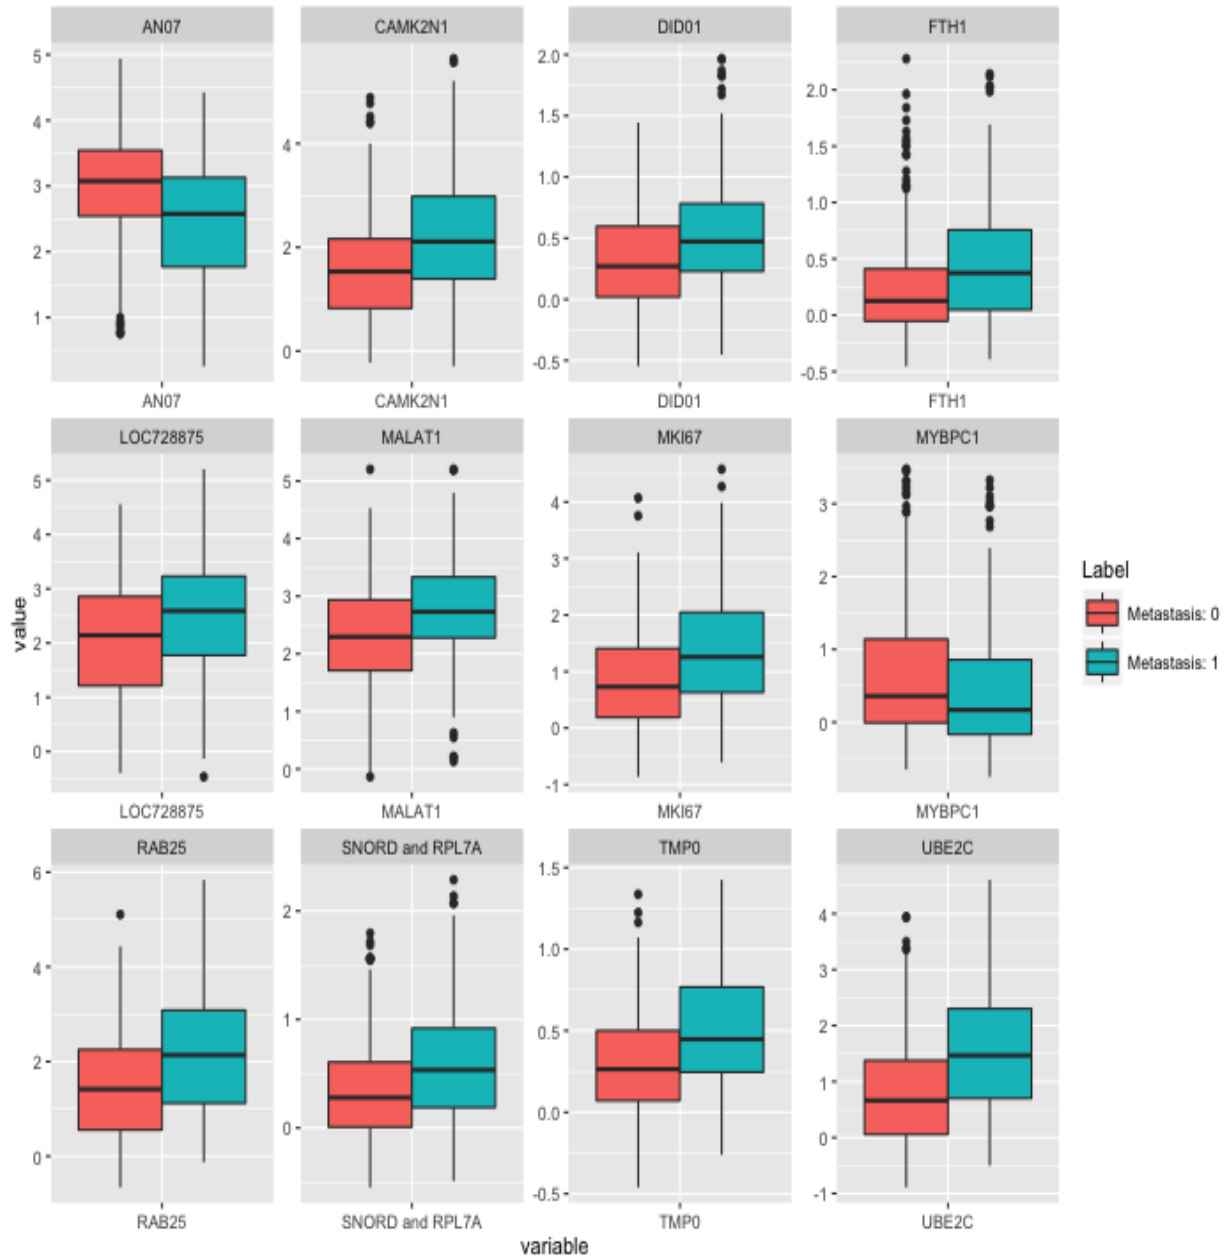

Supplement: 8209453.f1.pdf [file 8209453.f1.pdf]
